# Supplementary material
Source: PubMed Central journal article supplement (PMC4355094)
Supplement: NIHMS631719-supplement-10865_2014_9601_MOESM1_ESM.pdf [file NIHMS631719-supplement-10865_2014_9601_MOESM1_ESM.pdf]

A Meta-analysis of the Relationship between Social Constraints and Distress in Cancer Patients

Journal of Behavioral Medicine

Rebecca N. Adams, M.S.,<sup>1</sup> Joseph G. Winger, M.S.,<sup>1</sup> and Catherine E. Mosher, Ph.D.<sup>1</sup>

<sup>1</sup>Department of Psychology, Indiana University-Purdue University Indianapolis, Indianapolis, IN

Correspondence concerning this article should be addressed to Rebecca N. Adams, M.S., Email:  
rnadams@iupui.edu.

## Online Resource 1. Reasons for Record Exclusion

### **Study sample overlaps with another article that was included in the analyses ( $n = 22$ ):**

1. Beckman, N. (2008). *The role of emotional expressivity as a moderator between social constraints and coping and distress in male and female cancer patients*. Master's thesis, Rosalind Franklin University of Medicine and Science, US. (1454895)
2. Christensen, S., Jensen, A. B., Møller, S., & Zachariae, R. (2011). *Dimensions of social relations predictive of depressive symptoms at 1-year follow-up in a nationwide Danish cohort of women treated for primary breast cancer*. Paper presented at the IPOS 13th World Congress of Psycho-Oncology, Antalya, Turkey.
3. Cordova, M. J. (1999). *Cognitive processing and the positive and negative psychosocial sequelae of breast cancer*. Ph.D. Dissertation, University of Kentucky, US. (UMI Number: 9948847)
4. Cunningham, L. L. C. (1999). *Emotional expressivity, cognitive processing, and psychological distress in women with breast cancer*. Dissertation, University of Kentucky, US. Retrieved from <http://search.ebscohost.com/login.aspx?direct=true&db=psyh&AN=2000-95010-063&site=ehost-live> Available from EBSCOhost psych database.
5. Danhauer, S. C., Russell, G. B., Jesse, M. T., Vishnevsky, T., Daley, K., Carroll, S., . . . Tedeschi, R. G. (2009). *A longitudinal investigation of post-traumatic growth in adult patients undergoing treatment for acute leukemia*. Paper presented at the American Psychosocial Oncology Society, Charlotte, NC.
6. Green, H. J., Ferguson, M., Shum, D. H., & Chambers, S. K. (2013). Prospective individual and social predictors of changes in adjustment for patients attending a regional cancer service. *Quality of Life Research*, 22, 759-770. doi: 10.1007/s11136-012-0204-9
7. Helgeson, V., Novak, S. A., Lepore, S., & Eton, D. T. (2004). Spouse social control efforts: Relations to health behavior and well-being among men with prostate cancer. *Journal of Social and Personal Relationships*, 21, 53-68. doi: 10.1177/0265407504039840
8. Jesse, M. T., Vishnevsky, T., Danhauer, S. C., Russell, G. B., Daley, K., Tedeschi, R. G., . . . Cann, A. (2009). *A longitudinal investigation of social constraint in adult patients undergoing treatment for acute leukemia*. Paper presented at the American Psychosocial Oncology Society, Charlotte, NC.
9. Manne, S. (1999). Intrusive thoughts and psychological distress among cancer patients: The role of spouse avoidance and criticism. *Journal of Consulting and Clinical Psychology*, 67, 539-546. doi: 10.1037//0022-006X.67.4.539

10. Manne, S., Myers, S., Ozga, M., Kissane, D., Kashy, D., Rubin, S., . . . Rosenblum, N. (2014). Holding back sharing concerns, dispositional emotional expressivity, perceived unsupportive responses and distress among women newly diagnosed with gynecological cancers. *General Hospital Psychiatry, 36*, 81-87. doi: 10.1016/j.genhosppsy.2013.10.001
11. Manne, S., Ostroff, J., Winkel, G., Grana, G., & Fox, K. (2005). Partner unsupportive responses, avoidant coping, and distress among women with early stage breast cancer: Patient and partner perspectives. *Health Psychology, 24*, 635-641. doi: 10.1037/0278-6133.24.6.635
12. Manne, S., Rini, C., Rubin, S., Rosenblum, N., Bergman, C., Edelson, M., . . . Rocereto, T. (2008). Long-term trajectories of psychological adaptation among women diagnosed with gynecological cancers. *Psychosomatic Medicine, 70*, 677-687. doi: 10.1097/PSY.0b013e31817b935d
13. Manne, S., Taylor, K. L., Dougherty, J., & Kemeny, N. (1997). Supportive and negative responses in the partner relationship: Their association with psychological adjustment among individuals with cancer. *Journal of Behavioral Medicine, 20*, 101-125.
14. McDowell, M. E., Occhipinti, S., Ferguson, M., & Chambers, S. K. (2011). Prospective predictors of psychosocial support service use after cancer. *Psycho-Oncology, 20*, 788-791. doi: 10.1002/pon.1774
15. Nenova, M., DuHamel, K., Zemon, V., Rini, C., & Redd, W. H. (2013). Posttraumatic growth, social support, and social constraint in hematopoietic stem cell transplant survivors. *Psycho-Oncology, 22*, 195-202. doi: 10.1002/pon.2073
16. Norton, T. R., & Manne, S. (2007). Support concordance among couples coping with cancer: Relationship, individual, and situational factors. *Journal of Social and Personal Relationships, 24*, 675-692. doi: 10.1177/0265407507081454
17. Quartana, P. J., Schmaus, B. J., & Zakowski, S. G. (2005). Gender, neuroticism, and emotional expressivity: Effects on spousal constraints among individuals with cancer. *Journal of Consulting and Clinical Psychology, 73*, 769-776. doi: 10.1037/0022-006X.73.4.769
18. Roberts, K. J. (2004). *Applying the social cognitive processing model to predict adjustment in men treated for prostate cancer*. Dissertation, Columbia University, US.
19. Sandgren, A. K., & Mccauley, K. D. (2007). Long-term telephone therapy outcomes for breast cancer patients. *Psycho-Oncology, 16*, 38-47. doi: 10.1002/pon.1038
20. Steginga, S. K., Campbell, A., Ferguson, M., Beeden, A., Walls, M., Cairns, W., & Dunn, J. (2008). Socio-demographic, psychosocial and attitudinal predictors of help seeking after cancer diagnosis. *Psycho-Oncology, 17*, 997-1005. doi: 10.1002/pon.1317

21. Zachariae, R., Christensen, S., Jensen, A. B., & Møller, S. (2009). *A prospective study of post-traumatic stress in a nationwide cohort of Danish women with primary breast cancer*. Paper presented at the IPOS 11th World Congress of Psycho-Oncology, Vienna, Austria.
22. Zakowski, S. G., Ramati, A., Morton, C., Johnson, P., & Flanigan, R. (2004). Written emotional disclosure buffers the effects of social constraints on distress among cancer patients. *Health Psychology, 23*, 555-563. doi: 10.1037/0278-6133.23.6.555

**Insufficient information was obtained to calculate effect sizes after contacting the authors (n =6):**

1. Andrykowski, M. A., & Steffens, R. (2011). *Disparities in mental health and mental health coping resources between rural and nonrural small cell lung cancer survivors: A population-based study*. Paper presented at the IPOS 13th World Congress of Psycho-Oncology, Antalya, Turkey.
2. Bishop, M. M., Beaumont, J. L., Hahn, E. A., Cella, D., Andrykowski, M. A., Brady, M. J., . . . Wingard, J. R. (2007). Late effects of cancer and hematopoietic stem-cell transplantation on spouses or partners compared with survivors and survivor-matched controls. *Journal of Clinical Oncology, 25*, 1403-1411. doi: 10.1200/JCO.2006.07.5705
3. de Moor, J. S., Moyé, L., Low, D., Rivera, E., Singletary, S. E., Fouladi, R. T., & Cohen, L. (2008). Expressive writing as a presurgical stress management intervention for breast cancer patients. *Journal of the Society for Integrative Oncology, 6*, 59-66. doi: 10.2310/7200.2008.0010
4. Manne, S., Audrain, J., Schwartz, M., Main, D., Finch, C., & Lerman, C. (2004). Associations between relationship support and psychological reactions of participants and partners to BRCA1 and BRCA2 testing in a clinic-based sample. *Annals of Behavioral Medicine, 28*, 211-225. doi: 10.1207/s15324796abm2803\_10
5. Manne, S., Badr, H., & Kashy, D. A. (2012). A longitudinal analysis of intimacy processes and psychological distress among couples coping with head and neck or lung cancers. *Journal of Behavioral Medicine, 35*, 334-346. doi: 10.1007/s10865-011-9349-1
6. Manne, S., Ostroff, J. S., & Winkel, G. (2007). Social-cognitive processes as moderators of a couple-focused group intervention for women with early stage breast cancer. *Health Psychology, 26*, 735-744. doi: 10.1037/0278-6133.26.6.735
